# Supplementary material
Source: HighWire-hosted journal article supplement (https://bmjopengastro.bmj.com/highwire/filestream/3507/field_highwire_adjunct_files/0/bmjgast-2023-001115supp001_data_supplement.pdf)
Supplement: bmjgast-2023-001115supp001_data_supplement.pdf [file bmjgast-2023-001115supp001_data_supplement.pdf]

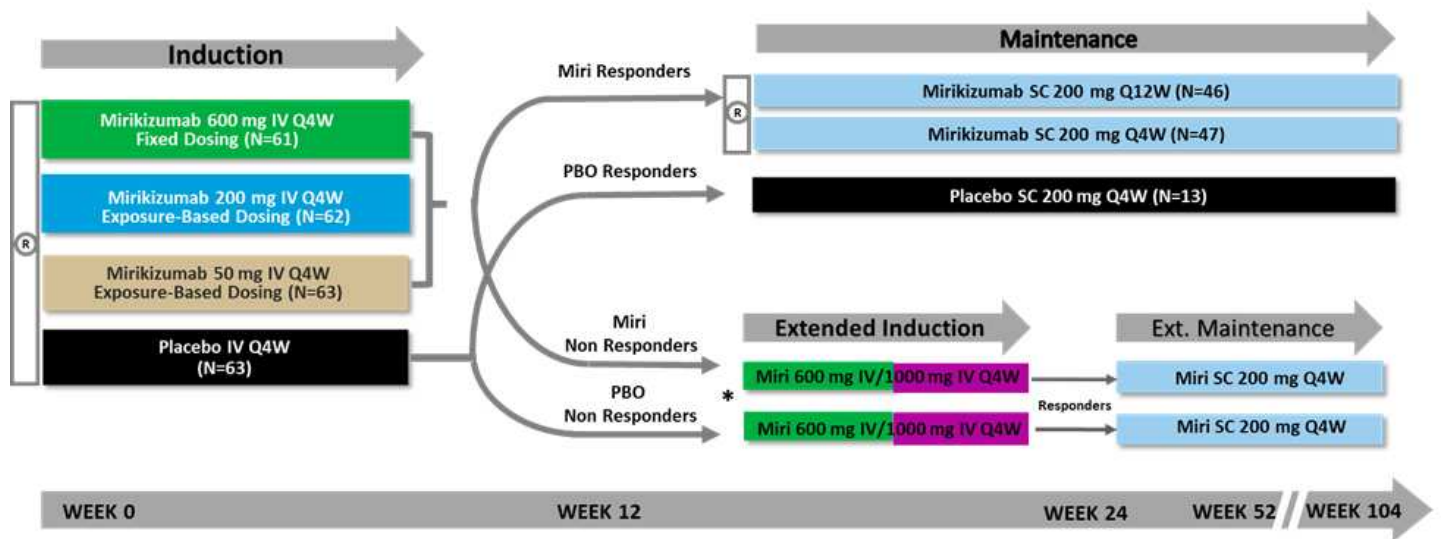

Ⓡ Randomization

\* Initially all patients received 600 mg miri IV every 4 weeks; after a protocol amendment this was increased to 1000 mg
